# Supplementary material for: Socioeconomic Impact of Mining in the Atiwa Forest Reserve of Ghana on Fringe Communities and the Achievement of SDGs: Analysis from the Residents’ Perspective
Source: MDPI journal article supplement (doi:10.3390/f12101395), 2021-10-13
Supplement: s1 [file s1]

## **APPENDIX:**

### **QUESTIONNAIRE ON BAUXITE MINING IN THE ATIWA FOREST RESERVE**

The aim of this questionnaire is to elicit for information to enable the researchers examine the “socioeconomic impact of the proposed mining in the Atiwa forest reserve of Ghana”. Please, kindly give the best response(s) you can. You are to answer the questions and give reason(s) where necessary. Tick (✓) for the answer you choose. Your responses will be treated with utmost confidentiality.

#### **SECTION A: Background information on respondents**

1. Gender:
  - a. Male
  - b. Female
  
2. Age:
  - a. 18-25
  - b. 26-29
  - c. 30-39
  - d. 40-49
  - e. 50-59
  - f. 60+
  
3. Educational Background (Highest Attainment):
  - a. No formal education
  - b. No formal education but can read and write
  - c. Basic (Primary, Junior High, Middle School)
  - d. Secondary (Senior High, Technical, Vocational)
  - e. Tertiary education
  
4. Occupation:
  - a. Student
  - b. Farmer
  - c. Teacher
  - d. Civil/public servant
  - e. Trader/businessman
  - f. Artisan
  - g. Unspecified/Employed
  
5. Size of household (household refers to a group of people who eat from the same pot and share the same housekeeping arrangements).
  - a. 1
  - b. 2
  - c. 3
  - d. 4
  - e. 5
  - f. 6+

**SECTION B: Awareness level of the proposed mining project**

6. Are you aware of the proposed mining of the Atiwa forest reserve?
  - a. Yes
  - b. No
7. If “Yes” in question 6, what is your source of information?
  - a. Radio
  - b. Television
  - c. Newspaper
  - d. Social media
  - e. Community information center
  - f. Person to person (direct conversation)
  - g. Other, please specify.....

**SECTION C: Socioeconomic impacts of mining bauxite in the forest reserve on livelihoods**

8. Do you depend directly of the forest reserve for livelihood?
  - a. Yes
  - b. No
9. If “Yes” in question 8, what do you depend on the forest reserve for?
  - a. Food (plant and animal)
  - b. Water
  - c. Wood
  - d. Medicine
  - e. Other, please specify.....
10. What is your source of drinking water?
  - a. Pipe borne water
  - b. Well/borehole
  - c. Rivers/Streams
  - d. Rainwater
11. Do you think mining in the forest reserve will have a direct impact on your livelihood?
  - a. Yes
  - b. No
12. If “Yes” in question 11, do you think mining in the forest reserve will have a positive or negative impact on your livelihood?
  - a. Positive
  - b. Negative
13. If “Positive” in question 12, how is the mining going to benefit you?

.....

.....

.....

14. If “Negative” in question 12, how is the mining going to affect you?

.....  
.....  
.....

15. Do you support the proposed mining of the Atiwa forest reserve?

- a. Yes                      b. No

16. If “Yes” in question 15, please specify your reason(s).

.....  
.....  
.....

17. If “No” in question 15, please specify your reason(s).

.....  
.....  
.....

**THANK YOU FOR YOUR PARTICIPATION**
